# Supplementary material for: Clutter mitigation, multiple peaks, and high-order spectral moments in 35 GHz vertically pointing radar velocity spectra
Source: Copernicus journal article supplement (doi:10.5194/amt-11-4963-2018), 2018-09-03
Supplement: Supplementary file 1 [file amt-11-4963-2018-supplement.zip]

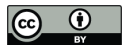

## *Supplement of*

# **Clutter mitigation, multiple peaks, and high-order spectral moments in 35 GHz vertically pointing radar velocity spectra**

**Christopher R. Williams et al.**

*Correspondence to:* Christopher R. Williams ([christopher.williams@colorado.edu](mailto:christopher.williams@colorado.edu))

- amt-11-4963-2018-supplement-title-page.pdf
- Read\_Me\_2018\_0801v1.pdf
- func\_calc\_Vmean\_var.m
- func\_calc\_multi\_peak\_ge\_moments.m
- func\_convert\_netCDF\_time\_to\_vector.m
- func\_copy\_spc\_from\_archive\_to\_local\_disk\_kazr\_ge\_2018\_0427.m
- func\_declutter\_spc.m
- func\_delete\_local\_copy\_of\_spc\_kazr\_ge\_2018\_0427.m
- func\_fill\_time\_gaps\_with\_NaN\_profiles.m
- func\_find\_mean\_HS\_noise.m
- func\_find\_moments.m
- func\_find\_multi\_mom\_3spc\_Vmean\_prior.m
- func\_find\_noise\_adjusted\_zdb\_and\_snr.m
- func\_find\_single\_peak.m
- func\_find\_single\_peak\_Vmean\_prior\_valley.m
- func\_ge\_ave\_spc\_to\_15sec\_and\_calc\_mom\_and\_save\_spc.m
- func\_get\_hourly\_spc\_into\_mat\_kazr\_ge\_copol\_2018\_0427.m
- func\_incoherent\_ave\_spc\_valid\_obs.m
- func\_make\_daily\_mat\_files.m
- func\_plot\_15sec\_kazr\_ZVSkew\_mom\_ge\_copol.m

- func\_plot\_15sec\_kazr\_ZVW\_mom\_ge\_copol.m
- func\_read\_kazr\_netCDF\_file\_no\_spectra.m
- func\_read\_kazr\_spc\_time\_in\_netCDF\_file.m
- func\_read\_nc\_file.m
- func\_remove\_isolated\_pixels\_3x3.m
- func\_replace\_Nstd\_nos\_with\_NaN.m
- func\_save\_ge\_all\_mom\_in\_netCDF.m
- func\_shift\_then\_ave\_spc.m
- main\_make\_oli\_hourly\_mat\_spc\_kazr\_ge\_copol\_2018\_0606.m
- main\_oli\_dcl\_15s\_spc\_kazr\_ge\_copol\_v15.m
- main\_plot\_ge\_15sec\_mom\_nc\_all\_ZVW\_2018\_0718.m
- main\_save\_daily\_ge\_15sec\_all\_mom\_as\_netCDF\_2018\_0718.m

The copyright of individual parts of the supplement might differ from the CC BY 4.0 License.
